# Supplementary material
Source: PubMed Central journal article supplement (PMC2998398)
Supplement: NIHMS251697-supplement-1_si_001.pdf [file NIHMS251697-supplement-1_si_001.pdf]

# Superhydrophobic Thin Films Fabricated by Reactive Layer-by-Layer Assembly of Azlactone-Functionalized Polymers

Maren E. Buck,<sup>1</sup> Sarina C. Schwartz,<sup>1</sup> and David M. Lynn<sup>1,2,\*</sup>

<sup>1</sup>Department of Chemistry, 1101 University Avenue, and <sup>2</sup>Department of Chemical and Biological Engineering, 1415 Engineering Drive, University of Wisconsin-Madison, Madison, WI 53706

## Supporting Information

### Monomer activation:

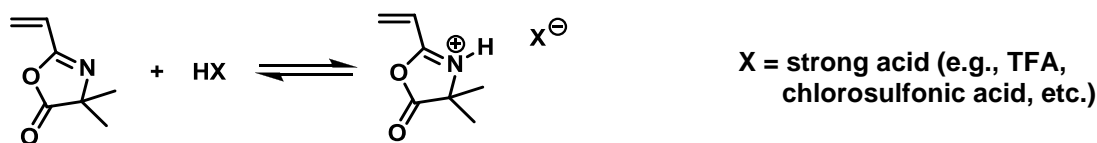

### Initiation:

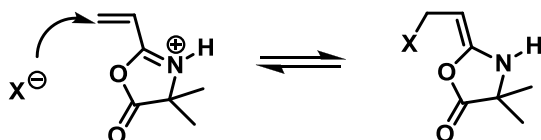

### Propagation:

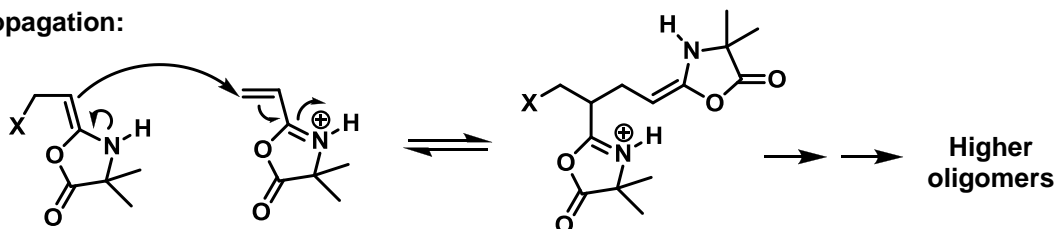

**Figure S1.** Activation, initiation, and propagation of the acid-catalyzed oligomerization of VDMA as proposed by Heilmann et al.<sup>1</sup> The nitrogen of the azlactone ring is protonated by a strong acid to activate the azlactone ring. A counterion then adds to the activated monomer by Michael Addition to the olefin, forming an enol-like intermediate. This enol-like tautomer can then undergo a subsequent Michael Addition reaction with an additional unit of activated monomer to form the dimer. This process can propagate to form higher order oligomers (i.e., trimers, tetramers, pentamers, etc.; see Figure S2 for structures).

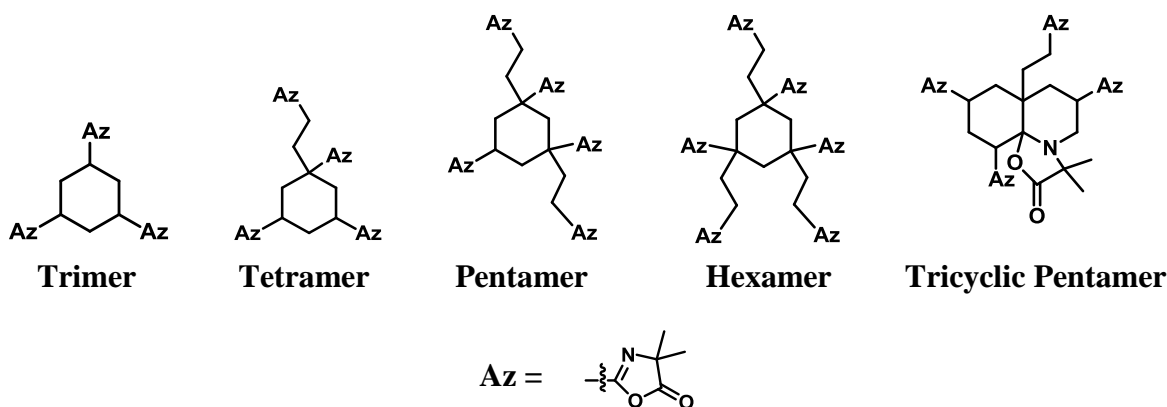

**Figure S2.** Structures of cyclic oligomers formed during oligomerization, as proposed by Heilmann et al.<sup>1</sup>

**Table S1.** LC-MS characterization of oligomer precipitated from non-distilled monomer. The oligomers were hydrolyzed prior to LC-MS analysis to improve solubility in aqueous solvents and the resolution of the peaks on the LC column, as described previously by Heilmann et al.<sup>1</sup>

| $M_w$ | MS assignment <sup>a</sup>   |
|-------|------------------------------|
| 158   | Monomer + 1H <sub>2</sub> O  |
| 315   | Dimer + 2H <sub>2</sub> O    |
| 472   | Trimer + 3H <sub>2</sub> O   |
| 611   | Tetramer + 3H <sub>2</sub> O |
| 629   | Tetramer + 4H <sub>2</sub> O |
| 768   | Pentamer + 4H <sub>2</sub> O |
| 784   | Pentamer + 5H <sub>2</sub> O |
| 925   | Hexamer + 5H <sub>2</sub> O  |
| 941   | Hexamer + 6H <sub>2</sub> O  |

<sup>a</sup> Mass spectrometry notations refer to the extent of hydrolysis of each oligomeric structure. For example, “Tetramer + 3H<sub>2</sub>O” indicates that 3 out of 4 azlactone rings have been hydrolyzed.

**Table S2.** LC-MS characterization of intentionally synthesized oligomers. The oligomers were hydrolyzed prior to LC-MS analysis to improve solubility in aqueous solvents and the resolution of the peaks on the LC column, as described previously by Heilmann et al.<sup>1</sup>

| $M_w$ | MS assignment <sup>a</sup>   |
|-------|------------------------------|
| 418   | Trimer                       |
| 472   | Trimer + 3H <sub>2</sub> O   |
| 629   | Tetramer + 4H <sub>2</sub> O |
| 732   | Pentamer + 2H <sub>2</sub> O |
| 768   | Pentamer + 4H <sub>2</sub> O |
| 871   | Hexamer + 2H <sub>2</sub> O  |

<sup>a</sup> Mass spectrometry notations refer to the extent of hydrolysis of each oligomeric structure. For example, “Tetramer + 3H<sub>2</sub>O” indicates that 3 out of 4 azlactone units have been hydrolyzed.

## References

1. Heilmann, S. M.; Moren, D. M.; Krepski, L. R.; Rasmussen, J. K.; Gaddam, B. N.; Roscoe, S. B.; Lewandowski, K. M.; McIntosh, L. H.; Roberts, R. R.; Fansler, D. D.; Szekely, G. G.; Weil, D. A.; Thakur, K. A.; Pathre, S. V.; Battiste, J. L.; Hanggi, D. A., *J. Macromol. Sci., Part A: Pure Appl. Chem.* **2003**, A40, 755-790.
